# Supplementary material
Source: PubMed Central journal article supplement (PMC3388898)
Supplement: supp_me.2010-0308_me-10-0308_Supplementary_Table_1.pdf [file supp_me.2010-0308_me-10-0308_Supplementary_Table_1.pdf]

Supplemental Table 1: List of selected differentially regulated genes in skeletal muscle of CRFR2 KO mice compared to WT littermates

| Genebank accession no. | Gene description                               | Fold Change* |
|------------------------|------------------------------------------------|--------------|
| AI788669               | Expressed sequence AI788669                    | 3.99         |
| M63658                 | Guanine nucleotide binding protein, beta 4     | 2.55         |
| AW120976               | Growth hormone inducible transmembrane protein | 2.18         |
| U29055                 | Guanine nucleotide binding protein, beta 1     | 2.05         |
| AI852161               | Tubulin specific chaperone e                   | 1.80         |
| L35236                 | Mitogen activated protein kinase 10            | 1.35         |
| AW120963               | Synbindin                                      | 0.72         |
| X55316                 | Nuclear transcription factor-Y beta            | 0.71         |
| M28739                 | Tubulin, beta 2                                | 0.67         |
| AI839702               | Copper chaperone for superoxide dismutase      | 0.62         |
| U83902                 | MAD2-like 1                                    | 0.56         |
| Y11682                 | Mitochondrial ribosomal protein S12            | 0.56         |
| AW124153               | SRY-box containing gene 4                      | 0.44         |
